# Supplementary material for: Schichtarbeitende im Dauer-Jetlag
Source: Springer Nature journal article supplement (doi:10.1007/s00058-021-2054-8), 2021-06-30
Supplement: MOESM1 [file 19317868]

## Infokasten: Tipps für guten Schlaf vor und nach den Schichten

| Frühschicht                                                                                                                                                                                                                                                                                                                                                                                                                                                                           | Spätschicht                                                                                                                                                                                                                                                                                                                                                                                                                                                                                                                                                                                       | Nachtschicht                                                                                                                                                                                                                                                                                                                                                                                                                                                                                                                                                                                                                                                                                                                                                                                                                                            | Alle Schichten                                                                                                                                                                                                                                                                                                                                                                                                                                                                                                                        |
|---------------------------------------------------------------------------------------------------------------------------------------------------------------------------------------------------------------------------------------------------------------------------------------------------------------------------------------------------------------------------------------------------------------------------------------------------------------------------------------|---------------------------------------------------------------------------------------------------------------------------------------------------------------------------------------------------------------------------------------------------------------------------------------------------------------------------------------------------------------------------------------------------------------------------------------------------------------------------------------------------------------------------------------------------------------------------------------------------|---------------------------------------------------------------------------------------------------------------------------------------------------------------------------------------------------------------------------------------------------------------------------------------------------------------------------------------------------------------------------------------------------------------------------------------------------------------------------------------------------------------------------------------------------------------------------------------------------------------------------------------------------------------------------------------------------------------------------------------------------------------------------------------------------------------------------------------------------------|---------------------------------------------------------------------------------------------------------------------------------------------------------------------------------------------------------------------------------------------------------------------------------------------------------------------------------------------------------------------------------------------------------------------------------------------------------------------------------------------------------------------------------------|
| <ul style="list-style-type: none"> <li>○ Alle Aktivitäten des Tages (Abendessen, Familie, Fernsehen) etwas vorverlagern</li> <li>○ Kein Mittagschlaf – falls doch notwendig, max. für 15 Minuten und nicht nach 16 Uhr</li> <li>○ Helles Licht am Morgen, wechselwarme Duschen oder Sport erleichtern das Aufstehen und reduzieren den Hang-over</li> <li>○ Helles Licht am Arbeitsplatz, nicht zu hohe Raumtemperatur, Koffein und kurze Pausen-Naps fördern die Wachheit</li> </ul> | <ul style="list-style-type: none"> <li>○ Morgens ausreichend schlafen, Gesamtschlafbedürfnis beachten</li> <li>○ Falls möglich, kurzes Nickerchen vor Arbeitsbeginn (max. 15 min)</li> <li>○ Keine schweren Mahlzeiten während und nach der Schicht</li> <li>○ Koffein in Maßen und nur in der ersten Arbeitshälfte. Kurze Pausen-Naps fördern die Wachheit.</li> <li>○ Nach der Schicht ausreichend Zeit zum Abschalten nehmen, aber keinen Sport betreiben</li> <li>○ Helles Licht am Morgen, wechselwarme Duschen oder Sport erleichtern das Aufstehen und reduzieren den Hang-over</li> </ul> | <ul style="list-style-type: none"> <li>○ Mehrere kurze Naps während der Schicht – wenn erlaubt – sind leistungssteigernd</li> <li>○ Helles Licht in der Nacht fördert Wachheit, Koffein nur zu Beginn der Nachtschicht</li> <li>○ Nach der Schicht das helle Sonnenlicht vermeiden (Sonnenbrille auf dem Heimweg)</li> <li>○ Keine Arbeiten, Sport oder andere körperliche Aktivitäten vor dem Zubettgehen</li> <li>○ Gesamtschlafbedürfnis und eine Hauptschlafperiode von mind. 4 Stunden beachten</li> <li>○ Erst zum festgesetzten Zeitpunkt aufstehen</li> <li>○ Ohrstöpsel, Augenbinde und kontrollierte Geräuschkulisse als Schallschutz</li> <li>○ Nickerchen unter 10 Minuten nach dem Hauptschlaf sind erlaubt</li> <li>○ Nach der letzten Nachtschicht nur kurzer Tagschlaf, um schnell wieder in den normalen Rhythmus zu kommen</li> </ul> | <ul style="list-style-type: none"> <li>○ Schlafhygiene: leichte Mahlzeiten und kein Alkohol vor dem Zubettgehen, angenehme Zimmeratmosphäre</li> <li>○ Einschlafritual, Entpflichtung und Abschalten</li> <li>○ Gedämpftes Licht, keine Internet- oder Smartphone-Aktivitäten</li> <li>○ Fantasiereisen und andere Entspannungstechniken im Bett</li> <li>○ Nicht unbedingt schlafen wollen!</li> <li>○ Falls Schlafmittel, nur sehr kurzwirksame Präparate</li> <li>○ Bis zum Weckerklingeln nicht auf den Wecker schauen</li> </ul> |

Quelle: Dr. Hans-Günter Weeß: Schlaf wirkt Wunder. Alles über das wichtigste Drittel unseres Lebens. Droemer Verlag.
